# Supplementary material for: Optimal plasticity for memory maintenance during ongoing synaptic change
Source: eLife journal article supplement (doi:10.7554/elife.62912), 2021-09-14

increasing rate of synaptic fluctuations

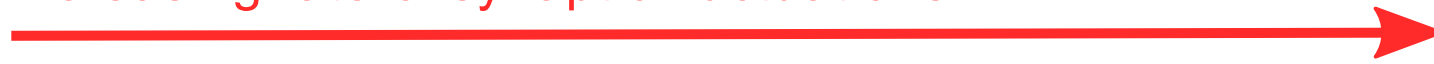

$$\|\epsilon\|_2 = 0.01\sqrt{N}$$

$$\|\epsilon\|_2 = 0.02\sqrt{N}$$

$$\|\epsilon\|_2 = 0.03\sqrt{N}$$

steady state error

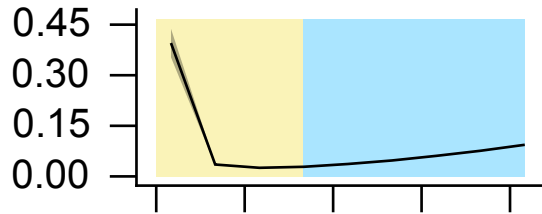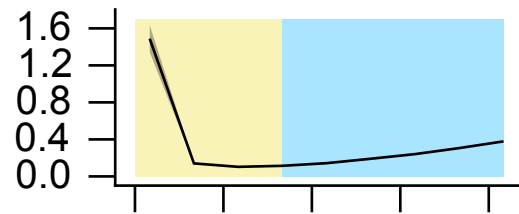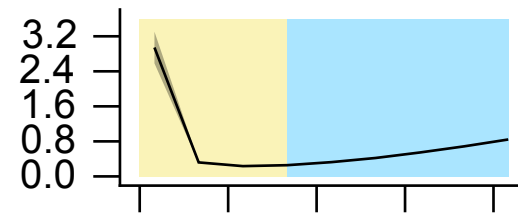

$$\frac{\gamma_2}{\gamma_1} = 0.1$$

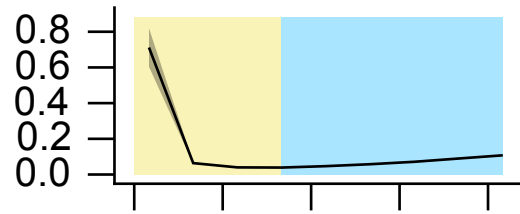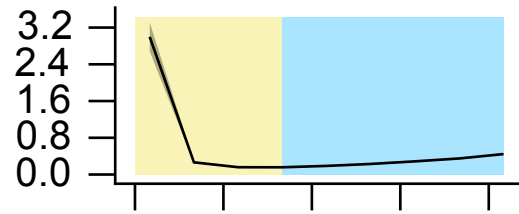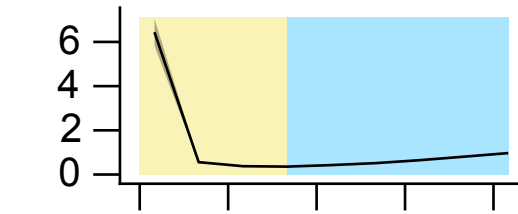

$$\frac{\gamma_2}{\gamma_1} = 10$$

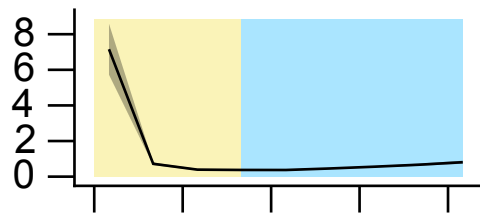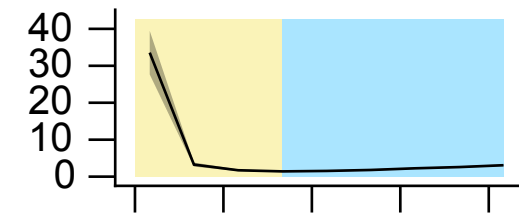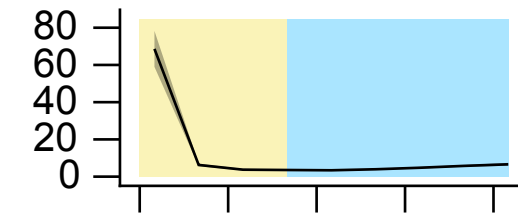

$$\frac{\gamma_2}{\gamma_1} = 50$$

strength of compensatory plasticity (ratio of  $\|\Delta c\|_2$  to  $\|\Delta \epsilon\|_2$  )

synaptic fluctuations  
dominate

compensatory  
plasticity dominates

decreasing  
accuracy of  
compensatory  
plasticity

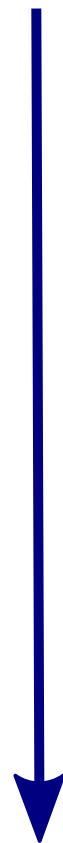

Supplement: supp [file elife_poa_e62912_Figure_5_figure_supplement_1.pdf › elife_poa_e62912_Figure_5_figure_supplement_1.pdf]
